1 Recurrent circuits amplify corticofugal signals and drive feed-forward inhibition in the  
2 inferior colliculus

3

4 Hannah M. Oberle<sup>1,2#</sup>, Alexander N. Ford<sup>2#</sup>, Pierre F. Apostolides<sup>2,3\*</sup>

5 1) Neuroscience Graduate Program

6 2) Kresge Hearing Research Institute, Department of Otolaryngology – Head & Neck  
7 Surgery

8 3) Molecular and Integrative Physiology, University of Michigan Medical School

9 #Equal Contribution

10 \*corresponding author: [piaposto@med.umich.edu](mailto:piaposto@med.umich.edu)

11

## 12 **Abstract**

13 The inferior colliculus (IC) is a midbrain hub critical for perceiving complex, time-varying  
14 sounds such as speech. In addition to processing ascending inputs from most auditory  
15 brainstem nuclei, the IC receives descending inputs from auditory cortex that control IC  
16 neuron feature selectivity, plasticity, and certain forms of perceptual learning. Although  
17 these corticofugal synapses primarily release the excitatory transmitter glutamate, many  
18 physiology studies show that auditory cortical activity has a net inhibitory effect on IC  
19 neuron spiking. Perplexingly, anatomy studies indicate that corticofugal axons primarily  
20 target glutamatergic IC neurons while only sparsely innervating IC GABA neurons,  
21 thereby suggesting that corticofugal inhibition of the IC occurs largely independently of  
22 feedforward activation of local GABA neurons. We shed light on this paradox using *in*  
23 *vitro* electrophysiology and optogenetics in acute IC slices from fluorescent reporter  
24 mice. We find that corticofugal synaptic strength is indeed stronger onto IC glutamate  
25 compared to GABA neurons. Nevertheless, two mechanisms enable reliable  
26 corticofugal activation of local GABA neurons. 1) Many IC GABA neurons fire tonically  
27 at rest, such that sparse and weak excitation suffices to significantly increase their spike  
28 rates. 2) Corticofugal activity triggers barrages of large amplitude, polysynaptic EPSPs  
29 in IC GABA neurons, owing to a dense intra-collicular connectivity from local axon  
30 collaterals of IC glutamate neurons. Consequently, repetitive activity in corticofugal  
31 fibers drives spikes in IC GABA neurons and generates substantial recurrent inhibition.  
32 Thus, descending signals trigger intra-collicular inhibition despite apparent constraints  
33 of monosynaptic connectivity between auditory cortex and IC GABA neurons.

34

## 35 **Introduction**

36 Feedback projections from the sensory neo-cortex to sub-cortical regions are ubiquitous  
37 in the mammalian brain. These corticofugal pathways enable “high-level”, cortical  
38 computations to rapidly control the nature of ascending sensory signals, thereby  
39 hypothetically supporting important “top-down” functions such as predictive coding, error  
40 propagation, or stream segregation (Briggs and Usrey, 2011; Stebbings et al., 2014;

41 Usrey and Sherman, 2019; Asilador and Llano, 2020). Interestingly, corticofugal activity  
42 often has a net inhibitory effect upon spontaneous and sensory-evoked activity in sub-  
43 cortical circuits, consequently sharpening receptive fields and increasing the  
44 sparseness of neuronal representations along the ascending sensory hierarchy (Syka  
45 and Popelár, 1984; Zhang et al., 1997; Bledsoe et al., 2003; Boyd et al., 2012; Crandall  
46 et al., 2015; Vila et al., 2019; Born et al., 2021; but see Kirchgessner et al., 2021).  
47 Corticofugal projections originate almost exclusively from excitatory (glutamatergic)  
48 neurons in cortical layers 5 and 6 (Hattox and Nelson, 2007; Schofield, 2009; Slater et  
49 al., 2013; Asilador and Llano, 2020; Sherman and Usrey, 2021), the well-documented  
50 inhibitory effects suggest that corticofugal activity primarily recruits sub-cortical,  
51 feedforward inhibitory (GABAergic) interneurons rather than faithfully detonating spikes  
52 in projection neurons. However, the cellular and circuit-level mechanisms that enable  
53 corticofugal activity to reliably generate sub-cortical inhibition are poorly understood; this  
54 knowledge gap persists owing to the difficulty of quantifying corticofugal transmission in  
55 identified excitatory and inhibitory neurons.

56

57 In the central auditory system, the corticofugal projection from auditory cortex to the  
58 inferior colliculus (IC) is of particular importance as the IC relays the majority of  
59 ascending acoustic signals destined for forebrain circuits. Accordingly, corticofugal  
60 activity powerfully shapes how IC neurons respond to diverse sound features, often via  
61 inhibitory interactions: Stimulating the auditory cortex dampens or completely  
62 suppresses IC acoustic responses (Syka and Popelár, 1984; Bledsoe et al., 2003; Vila  
63 et al., 2019; Blackwell et al., 2020), a result further corroborated by intracellular data  
64 showing that auditory cortex stimulation can drive synaptic inhibition in individual IC  
65 neurons (Mitani et al., 1983; Qi et al., 2020). Conversely, silencing auditory cortex often  
66 potentiates spontaneous and sound-evoked activity in the IC (Nwabueze-Ogbo et al.,  
67 2002; Popelár et al., 2003; Popelář et al., 2016; but see Zhang and Suga, 1997),  
68 indicating that ongoing auditory cortical activity can have a net inhibitory effect on the  
69 moment-to-moment excitability of IC neurons. However, anatomical data show that IC  
70 GABA neurons receive surprisingly few synapses from auditory cortex; the majority of  
71 corticofugal axons instead targeting glutamatergic IC neurons (Nakamoto et al., 2013;  
72 Chen et al., 2018). Thus, rather than recruiting *local* inhibitory neurons to sharpen IC  
73 neuron tuning curves, auditory cortex may instead exert inhibitory control through long-  
74 range inhibitory pathways (Beneyto et al., 1998; Budinger et al., 2000), via local effects  
75 *upstream* of the IC (Kong et al., 2014), or through a newly discovered, monosynaptic  
76 GABAergic corticofugal projection (Bertero et al., 2021). Alternatively, circuit  
77 mechanisms beyond the orthodox feedforward inhibitory motif, whereby long-range  
78 excitation preferentially drives GABAergic interneurons (Pouille and Scanziani, 2001;  
79 Gabernet et al., 2005; Cruikshank et al., 2007; Boyd et al., 2012), may nevertheless  
80 enable the auditory cortex to generate local inhibition in the IC.

81 We used patch-clamp electrophysiology and optogenetics in brain slices from  
82 fluorescent GABA reporter mice to study corticofugal transmission onto identified IC  
83 neurons. We focused specifically on neurons in the dorso-medial “shell” IC because this  
84 sub-region receives the densest projection of corticofugal axons (Winer et al., 1998;  
85 Song et al., 2018; Oberle et al., 2022). Our data confirm previous anatomical predictions  
86 by showing that corticofugal transmission is on average stronger onto shell IC glutamate  
87 compared to GABA neurons. However, we also find that shell IC GABA neurons are  
88 densely contacted by potent, intra-collicular synapses from local glutamate neurons. As  
89 such, repetitive corticofugal activity drives strong polysynaptic excitation in a subset of  
90 shell IC GABA neurons and generates local inhibition. Our results identify a novel  
91 mechanism for the neo-cortex to drive recurrent computations in a sub-cortical circuit.  
92 More broadly, the data establish a biophysical context via which descending inhibitory  
93 control operates in apparent absence of a dense, monosynaptic convergence onto  
94 inhibitory networks.

95

## 96 **Results**

97

### 98 *Cortical stimulation inhibits superficial IC neurons in vivo*

99 Previous studies show that stimulating the auditory cortex profoundly reduces sound-  
100 evoked spiking in IC neurons. As a first test to determine if we could similarly observe  
101 descending inhibition of IC neurons *in vivo*, we electrically stimulated the auditory cortex  
102 of urethane anesthetized mice during whole-cell patch-clamp recordings from neurons  
103 in the cortico-recipient, superficial IC layers. Indeed, single shocks (Figure 1B) or train  
104 stimulation (Figure 1C; 10 shocks delivered between 10-200 Hz) drove brief excitatory  
105 postsynaptic potentials (EPSPs) followed by large inhibitory postsynaptic potentials  
106 (IPSPs) in  $n = 4/7$  cells tested. Similar results were obtained with optogenetic  
107 stimulation of auditory cortex neurons expressing the light gated opsin Chronos: Single  
108 flashes of 473 nm light delivered to auditory cortex neurons drove EPSP/IPSP  
109 sequences in  $n = 6/21$  cells tested (Figure 1E). Interestingly, inhibition was also seen in  
110  $5/17$  IC neurons that did not receive any apparent excitation from auditory cortex. In  $n =$   
111  $4$  neurons, repetitive auditory cortical activity (80 stimuli at 20 Hz) caused a tonic or  
112 phasic hyperpolarization of the membrane potential (Figure 1F), whereas in 1 neuron  
113 tested, single light flashes generated a single, long-latency IPSP. Altogether these data  
114 indicate that in addition to the monosynaptic depolarizations mediated by glutamatergic  
115 corticofugal projections (Oberle et al., 2022), descending activity can also substantially  
116 hyperpolarize IC neurons, presumably via polysynaptic inhibition.

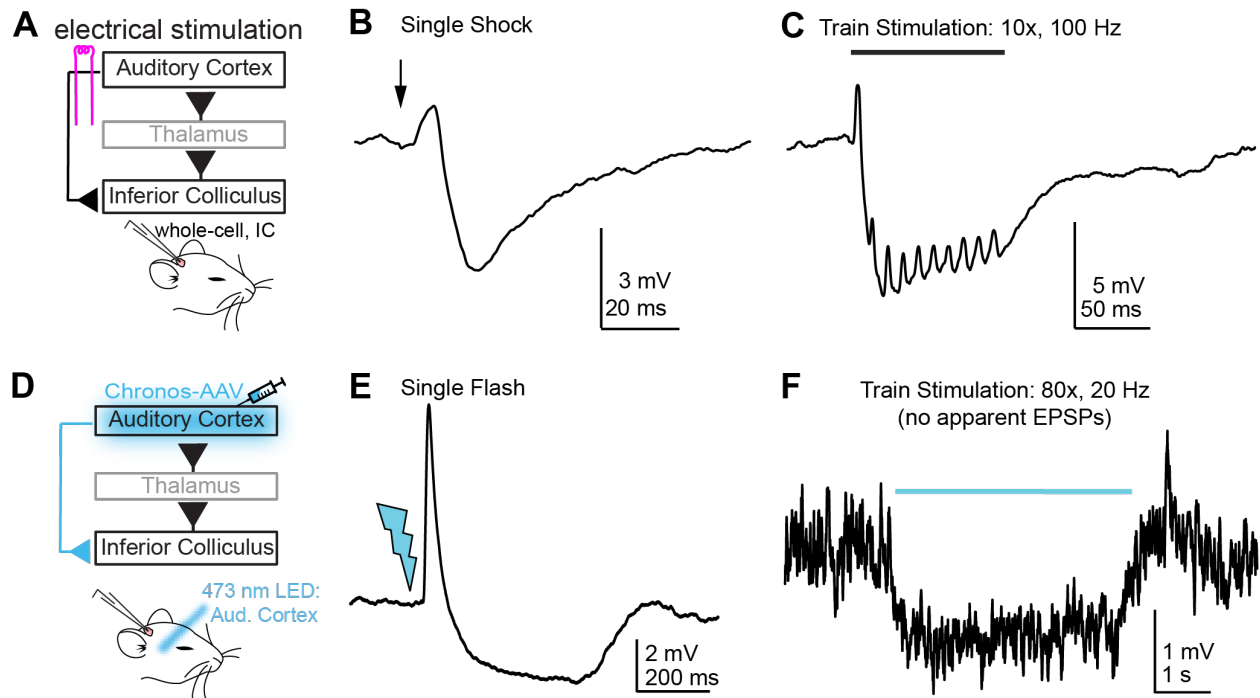

**Figure 1: Auditory cortical stimulation generates IPSPs in IC neurons.** **A)** Cartoon of experiment. Whole cell recordings are obtained from superficial IC neurons in urethane anesthetized mice; A bipolar electrode is placed in auditory cortex to activate corticofugal fibers. **B)** Example average trace showing a brief EPSP followed by a large and long-lasting IPSP upon auditory cortex stimulation. **C)** Example average trace showing that synaptic inhibition summates upon repetitive stimulation of auditory cortex. Data in B and C are from the same neuron. Stimulation artifacts are blanked for clarity. **D)** Chronos is expressed in auditory cortex neurons via AAV injections and 2-4 weeks later, whole-cell patch-clamp recordings are obtained from superficial IC neurons. **E)** Example average traces showing an EPSP-IPSP sequence following single light flashes delivered to the auditory cortex. **F)** In a different experiment as that shown in E, repetitive stimulation of auditory cortex generates no apparent EPSPs, but rather causes a sustained hyperpolarization of the neuron's membrane potential.

117 *Corticofugal synapses are stronger onto glutamate compared to GABA shell IC neurons*  
118 The hyperpolarization of IC neurons observed during auditory cortex stimulation is  
119 intriguing, as anatomy data suggest that auditory cortico-collicular axons preferentially  
120 synapse onto excitatory glutamatergic IC neurons; far fewer descending synapses  
121 target GABA neurons in the IC (Nakamoto et al., 2013; Chen et al., 2018). We thus  
122 wondered if the functional strength of auditory corticofugal synapses differed between  
123 glutamatergic and GABAergic IC neurons in a manner consistent with anatomical, or  
124 rather, physiological data (e.g., Figure 1). To this end, we expressed the red fluorescent  
125 protein tdTomato specifically in GABAergic neurons by crossing crossed VGAT-ires-cre  
126 and Ai14 fl/fl mouse lines. We then virally transduced the optogenetic activator Chronos  
127 in auditory cortex neurons of these mice via stereotaxic injections, and 2-4 weeks later,  
128 prepared acute brain slices for whole-cell patch-clamp electrophysiology (Figure 2A,B).

129 We targeted either tdTomato-positive or -negative somata in the dorso-medial shell IC  
130 to record from GABAergic or presumptive glutamatergic neurons, respectively  
131 (Supplemental Figure 1A,B). Single flashes of blue light delivered through the  
132 microscope objective activated Chronos-expressing auditory cortico-collicular axons  
133 and generated EPSPs that were >3-fold larger in glutamate compared to GABA neurons  
134 (Figure 2B,C. Median amplitude: 1.86 vs. 0.58 mV, n=29 glutamate neurons from N = 9  
135 mice and n=37 GABA neurons from N=10 mice, respectively. p=0.0013, Kruskal-Wallis  
136 test). By contrast, median EPSP halfwidths were similar across the two neuron  
137 populations (37.5 vs. 41.0 ms, p=0.7223, Kruskal-Wallis test), indicating that amplitude  
138 differences were unlikely due to expression of postsynaptic glutamate receptors with  
139 differential glutamate affinity. Furthermore, these results were unlikely to reflect a  
140 preferential severing of GABA neuron dendrites during slice preparation, as

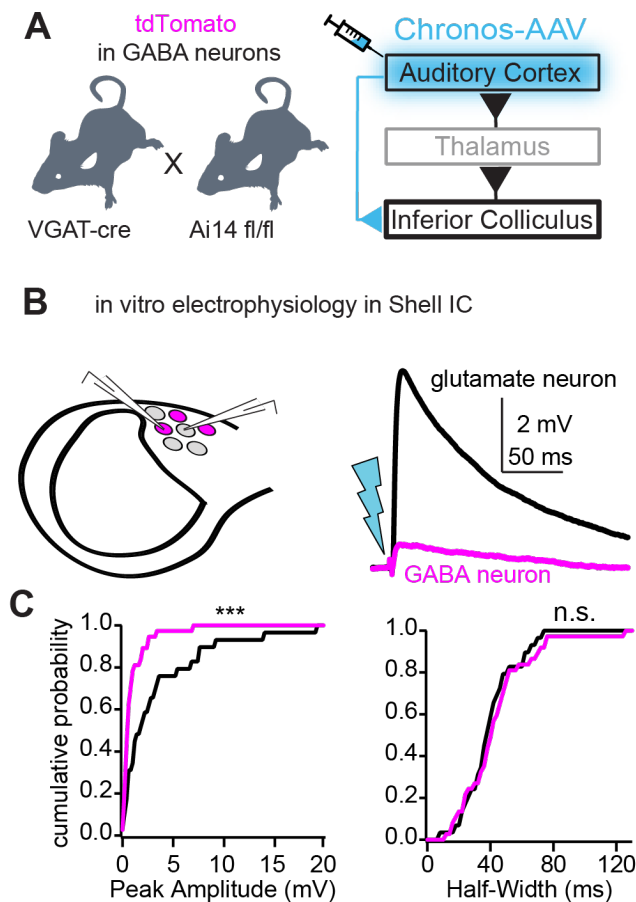

**Figure 2: Differential strength of corticofugal synapses onto shell IC GABA and glutamate neurons.** **A)** Diagram of experiment. The optogenetic activator Chronos is virally transduced into auditory cortex neurons of transgenic VGAT-cre x Ai14 mice. **B)** 2-4 weeks following surgery, corticofugal synaptic strength is assayed in presumptive GABA and glutamate neurons by recording optogenetically evoked EPSPs from visually targeted tdTomato-positive and negative neurons. Right, example average EPSPs evoked by single light flashes in a glutamate (black) and GABA (magenta) shell IC neuron. **C,D)** Summary data showing cumulative probability distributions for EPSP peak amplitudes (C) and half-widths (D) in glutamate and GABA neurons. Asterisks denote statistical significance.

141 instantaneous PSP rates were significantly higher in GABA compared to glutamate  
142 neurons (Figure 3A-C; median rate 15.9 vs. 7.4 Hz,  $n = 43$  GABA neurons from  $N = 10$   
143 mice and  $n = 26$  glutamate neurons from  $N = 9$  mice, respectively.  $p < 0.001$ , Kruskal-  
144 Wallis test). Instead, our results imply a specific connectivity logic to the auditory  
145 cortico-collicular pathway whereby glutamate, rather than GABA neurons are the major  
146 recipients of monosynaptic corticofugal signals. By contrast, the differential background  
147 PSP activity suggests that GABA neurons may receive a substantial number of  
148 excitatory synapses from the intra-collicular circuit.

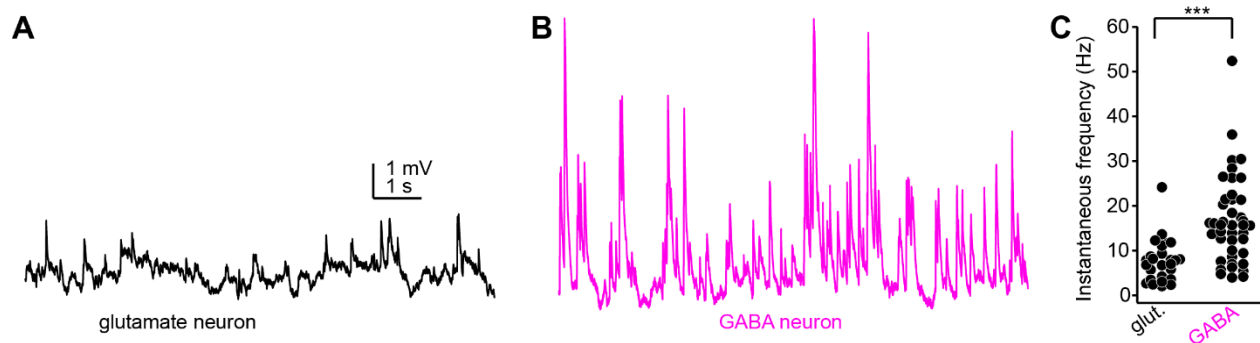

**Figure 3:** IC glutamate and GABA neurons have different rates of spontaneous PSP activity. **A,B)** Examples of spontaneous synaptic activity in single glutamate (A) or GABA (B) shell IC neurons. Scale bars apply to both panels. Of note is the higher rate and larger amplitude of spontaneous PSPs in the GABA neuron. **C)** Summary of instantaneous PSP rates for the two neuron classes.

#### 149 *A subset of IC GABA neurons tonically fire action potentials*

150 As expected from previous studies (Ono et al., 2005; Naumov et al., 2019), IC GABA  
151 and glutamate neurons displayed a range of overlapping cellular properties and could  
152 not be obviously distinguished based solely on membrane responses to current  
153 injections (Supplemental Figure 1C-H). However, we observed that GABA neurons  
154 were significantly more likely to tonically fire spikes at rest (Figure 4A,B. 34/68 GABA  
155 neurons fired tonically upon break-in compared to 1/25 glutamate neurons,  $\chi^2=17.14$ ,  
156  $p<0.001$ ). Consequently, even sparse synaptic excitation might suffice to significantly  
157 increase the mean firing rate of IC GABA neurons. Indeed, injecting small excitatory  
158 postsynaptic current (EPSC)-like waveforms (10-20 pA peak amplitude) at the soma of  
159 tonically firing GABA neurons significantly increased spike rates  $1.82 \pm 0.16$  fold relative  
160 to a pre-current injection baseline period (Figure 4C,D;  $n = 8$  cells from  $N = 2$  mice,  
161  $p=0.0012$ , one-sample t-test). Thus, a dense convergence of descending axons is not  
162 explicitly necessary to increase firing rates of shell IC GABA neurons.

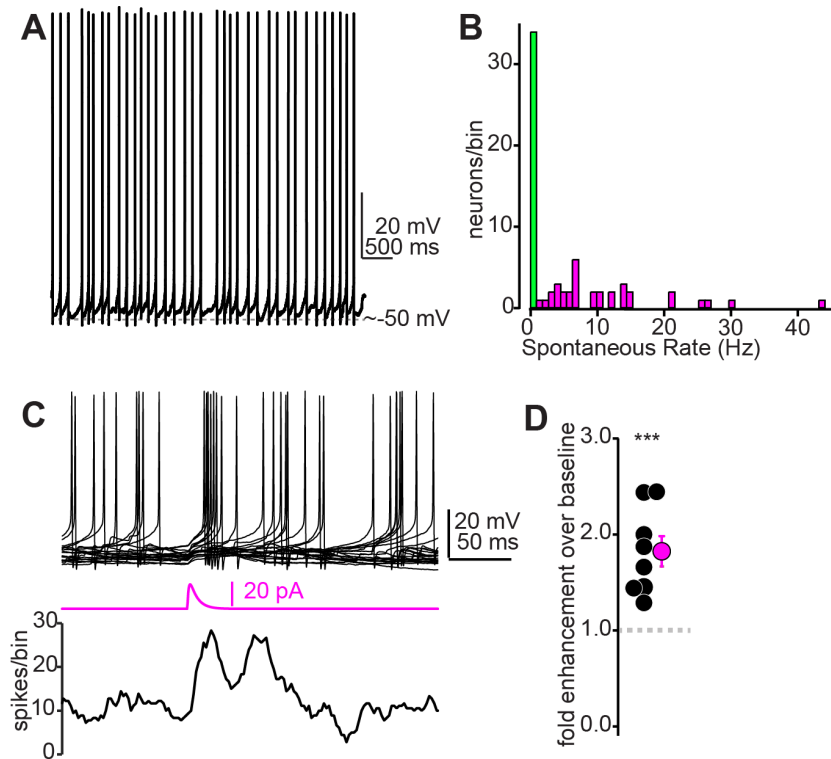

**Figure 4:** A subset of GABA neurons fire tonically, thus requiring only small currents to increase baseline firing rates **A)** Example trace from a tonic firing IC GABA neuron recorded in a VGAT-cre x Ai14 mouse. **B)** Summary histogram of tonic firing rates in IC GABA neurons. Green bin denotes neurons that did not fire tonically. **C)** Top: Example overlaid traces from a tonically firing IC GABA neuron. Middle: An EPSC-like current waveform (20 pA peak amplitude) increases spike probability in the ~50 ms following current injection, as exemplified in the spike (lower panel). **D)** Summary data from n=8 cells as in panel C, showing that small EPSC waveforms (10-20 pA) nearly double the spike probability of tonically firing GABA neurons.

### 163 *Shell IC GABA neurons receive powerful intra-collicular excitation*

164 The high rate of spontaneous PSPs in IC GABA neurons (Figure 3) might reflect a  
165 dense convergence of local, intra-collicular excitatory fibers. We tested this hypothesis  
166 by crossing G42 mice (Chattopadhyaya et al., 2004), which express GFP in a subset of  
167 IC GABA neurons (Supplemental Figure 2), with VGluT2-cre mice which express cre-  
168 recombinase in nearly all IC glutamate neurons (Chen et al., 2018). We then injected  
169 into the IC a cre-dependent virus packaging the red-shifted optogenetic activator  
170 ChrimsonR (Figure 5A). This approach enabled targeting our patch-clamp recordings to  
171 shell IC GABA neurons while selectively activating local glutamate neurons via an optic  
172 fiber coupled to a 625 nm LED (Figure 5B). We estimated the strength of unitary  
173 connections using a “minimal stimulation” paradigm designed to activate one or very  
174 few local inputs: The LED power level was titrated such that optogenetic stimulation  
175 fluctuated between synaptic successes and failures on a trial-by-trial basis (Figure 5C).

176 Under these conditions, successful EPSPs had a mean amplitude of  $2.8 \pm 0.3$  mV  
177 (Figure 5D,  $n = 11$  cells from  $N = 6$  mice). In addition, EPSP size grew monotonically  
178 with increasing LED power levels: EPSP amplitudes at maximal LED power had a  
179 median value 7.2 fold larger than EPSPs evoked with threshold stimulation (range: 2.2  
180 to 37.7; Figure 5E,F,  $n=12$  cells from  $N = 6$  mice). These measurements likely under-  
181 estimate the extent of synaptic connectivity due to the severing of connections during  
182 the slicing procedure. Consequently, our values probably represent a lower bound for  
183 the extent of intra-collicular convergence onto shell IC GABA neurons.

184

185 *Repetitive corticofugal activity drives polysynaptic excitation onto IC GABA neurons*

186 The dense convergence of intra-collicular excitation suggested by Figures 3 + 5 implies  
187 that corticofugal activity might drive spiking in IC glutamate neurons, subsequently  
188 causing polysynaptic EPSPs in IC GABA neurons. In this context, local recurrent

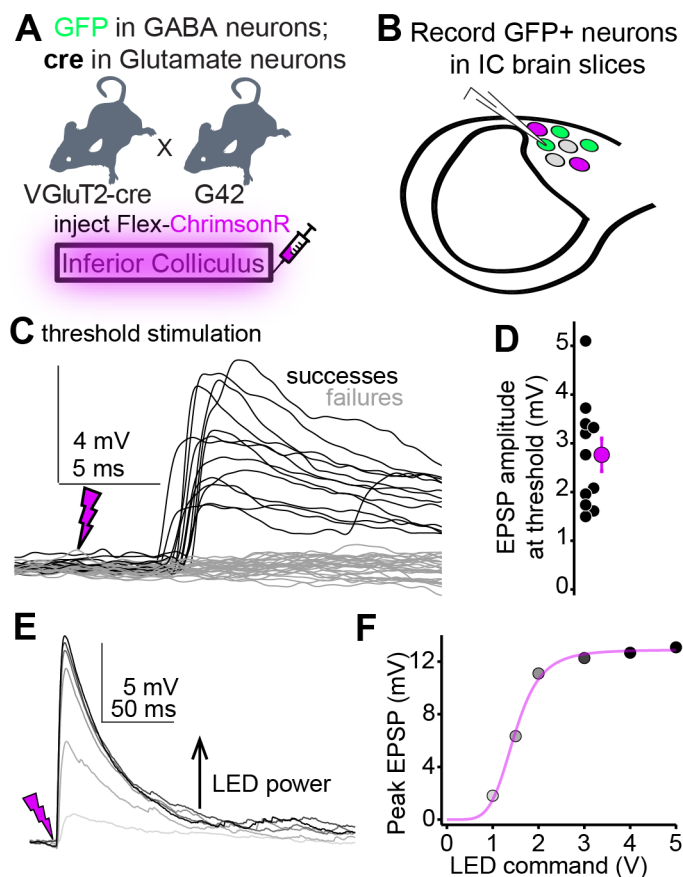

**Figure 5:** IC GABA neurons pool strong unitary excitatory inputs from multiple local glutamate neurons. **A,B)** Cartoon of experiment. A flex-ChrimsonR virus is injected in the IC of G42 x VGlut2-cre mice. 2-4 weeks later, patch-clamp recordings are targeted to GFP+ neurons in the shell IC and glutamate neurons are optically stimulated with 625 nm light via an optic fiber positioned above the slice (not shown). **C)** Example recording from a shell IC GABA neuron showing transmission successes (black) and failures (grey) following optical activation of ChrimsonR-expressing glutamate neurons. **D)** Summary data plotting the average peak amplitude of putative unitary EPSPs during threshold stimulation. Black is individual experiments, magenta is mean  $\pm$  SEM. **E,F)** Increasing LED power beyond threshold generates larger EPSPs, indicating that multiple presynaptic glutamate neurons converge onto a single postsynaptic GABA neuron. Data are from a different experiment as the one in C.



189 excitation would amplify auditory corticofugal signals onto IC GABA neurons  
190 independently of strong monosynaptic innervation. We tested this hypothesis by  
191 repetitively stimulating Chronos-expressing corticofugal axons (25 flashes at 50 Hz)  
192 while recording from GABA or glutamate neurons in VGAT-cre x Ai14 mice; these  
193 stimulation parameters are within the physiological range of sound-evoked firing rates in  
194 corticofugal neurons (Williamson and Polley, 2019).

195

196 In a subset of GABA neurons ( $n = 21$  neurons from  $N = 16$  mice), train stimuli triggered  
197 asynchronous barrages of large amplitude EPSPs that could be evoked even when  
198 single light flashes resulted in either weak or inapparent EPSPs (Figure 6A,B).  
199 Strikingly, these EPSP barrages were sometimes powerful enough to drive spikes even  
200 when the membrane potential was hyperpolarized with bias current to prevent tonic  
201 firing (Supplemental Figure 3). Close inspection of the raw traces indicated that these  
202 asynchronous EPSPs are generated by polysynaptic activity rather than monosynaptic  
203 inputs from auditory cortex: EPSPs occurred with a variable delay and displayed  
204 considerable temporal jitter in their onset following individual light flashes (Figure 6C).  
205 Additional examples of polysynaptic EPSPs in IC GABA neurons are provided in  
206 Supplemental Figure 4. Interestingly, EPSP barrages with long and variable latencies  
207 were less common in glutamate neurons ( $n = 2$  neurons from  $N = 2$  mice). Instead,  
208 single and train stimuli almost exclusively generated short latency EPSPs that were  
209 temporally locked to individual light pulses (Figure 6D-F;  $n = 14$  neurons from  $N = 8$   
210 mice), as expected from dense monosynaptic connectivity of corticofugal axons onto IC  
211 glutamate neurons.

212

213 The difference in EPSP timing between GABA and glutamate neurons is further  
214 apparent when the EPSP latencies after each pulse in the stimulus train are plotted as  
215 latency histograms for the two example cells in panels A-F: Whereas EPSPs in the  
216 glutamate neuron reliably occur  $\sim 3$ -4 ms following each pulse (Figure 6G), EPSP onsets  
217 in the GABA neuron are temporally dispersed over 10 ms following light stimuli (Figure  
218 6H). Consequently, double gaussian fits to the data reveal two clear peaks at  $\sim 3$  and  $\sim 7$   
219 ms in the histogram from the GABA neuron, but not in the data from the example  
220 glutamate neuron (see also Supplemental Figure 4C,F). A qualitatively similar result can  
221 be observed when averaging the membrane potential waveform of the example  
222 glutamate and GABA neurons following each light pulse in the 50 Hz train (Figure 6I):  
223 The cycle averages from the glutamate and GABA neurons show one and two peaks,  
224 respectively. We interpret the first short-latency peak as reflecting the monosynaptic  
225 input from corticofugal synapses, while the later, more temporally-jittered EPSPs reflect  
226 recurrent excitation from local IC glutamate neurons driven to spike by monosynaptic  
227 corticofugal inputs. Altogether, these data show that repetitive corticofugal activity  
228 triggers powerful recurrent excitation in shell IC GABA neurons.

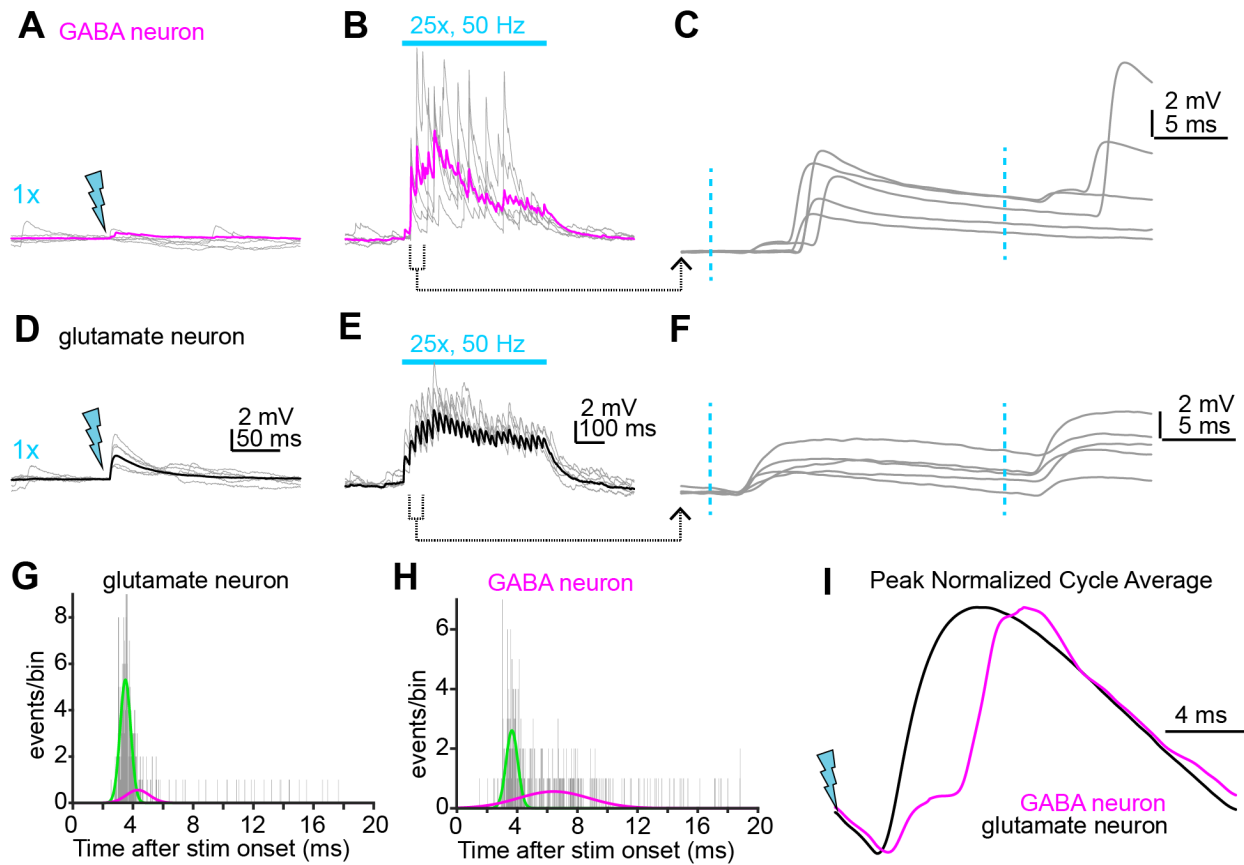

**Figure 6:** Repetitive corticofugal activity triggers polysynaptic excitation in the shell IC.

**A,B)** Example EPSPs in a GABA neuron during single (A) or train (B) stimuli delivered to corticofugal axons. While single light flashes generate negligible synaptic depolarization in this example, train stimulation drives powerful EPSP barrages. Gray traces are individual trials, magenta is average of multiple trials. **C)** The second and third stimuli from panel B are shown at faster timebase. Blue dotted lines denote light flashes. Of note is the long latency and jittered onset of the large EPSPs, a hallmark of polysynaptic origin. **D,E)** Same experimental approach as in A-B, but for a glutamate neuron. Gray traces are individual trials, black is average. Scale bars in D and E also apply to panels A and B, respectively. **F)** The second and third stimuli in the train from panel E are shown at a faster time base. Of note is the short latency and low onset jitter. **G,H)** Histograms of the EPSP onset latency after each of the 25 stimuli in the trains for the GABA and glutamate neurons shown in A-C and D-F, respectively. **I)** The membrane voltage following each stimuli in the 50 Hz trains is averaged and peak normalized. Black and magenta traces are data from the example glutamate and GABA neuron, respectively. Of note is the dual component EPSP in the GABA neuron, suggesting a monosynaptic corticofugal input followed by a much larger recurrent EPSP from the local circuit.

229 *Corticofugal activity preferentially triggers recurrent excitation in GABA neurons.*

230 Our data thus far suggest that corticofugal transmission drives monosynaptic excitation  
 231 of IC glutamate neurons, which in turn generate polysynaptic EPSPs in IC GABA  
 232 neurons. This hypothesis predicts that the primarily polysynaptic EPSPs in IC GABA  
 233 neurons should be uniquely sensitive to experimental manipulations that dampen the  
 234 feedforward spiking of IC glutamate neurons during corticofugal stimulation. By contrast,  
 235 the mostly monosynaptic corticofugal EPSPs onto IC glutamate neurons should be  
 236 comparatively less reduced by the same manipulation. We tested this prediction by

237 quantifying how a sub-saturating concentration of the AMPA receptor antagonist NBQX  
238 (50 nM) differentially impacts repetitive corticofugal activity (25 stimuli at 50 Hz) in IC  
239 glutamate and GABA neurons. This concentration of NBQX blocks 20-50% of the AMPA  
240 receptor charge transfer (Randle et al., 1992; Diamond and Jahr, 1997) and should  
241 decrease the probability that glutamate neurons fire spikes during corticofugal  
242 stimulation, thus non-linearly reducing polysynaptic EPSPs in GABA neurons.  
243 Accordingly, 50 nM NBQX reduced the total voltage integral during stimulus trains by  
244  $22\pm 7\%$  in glutamate neurons (Figure 7A,C;  $n=10$  cells from  $N = 8$  mice). By contrast, 50  
245 nM NBQX caused a significantly greater reduction in GABA neurons showing long-  
246 latency and asynchronous EPSPs ( $61\pm 3\%$  reduction, Figure 7B,C;  $n = 11$  cells from  $N =$   
247  $8$  mice;  $p<0.0001$  compared to glutamate neurons, paired t-test). Altogether these data  
248 argue that while auditory cortical activity drives spikes in GABA neurons (Supplemental  
249 Figure 3), much of the underlying depolarization is driven by local excitatory inputs  
250 rather than monosynaptic connections from corticofugal axons.

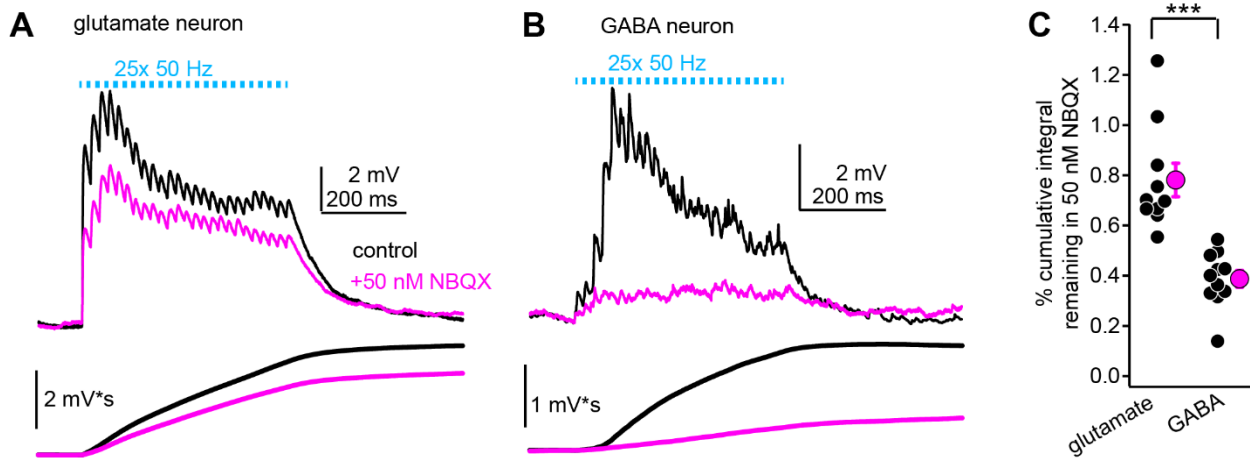

**Figure 7:** Differential block of “corticofugal” excitation in glutamate and GABA neurons by 50 nM NBQX. **A,B**) Example average train EPSPs from a shell IC glutamate (A) or GABA (B) neuron before and after bath application of 50 nM NBQX (black and magenta traces, respectively). Lower traces are the cumulative integral of the EPSP waveform. **C**) Summary data showing the fraction remaining in 50 nM NBQX for the for the cumulative integral of the EPSP waveform. Black and magenta symbols are individual experiments and mean  $\pm$  SEM, respectively. Asterisks denote statistical significance.

251

### 252 *Corticofugal inputs generates polysynaptic inhibition*

253 Our data show that auditory cortical activity strongly depolarizes IC GABA neurons via a  
254 combination of direct and polysynaptic excitation. If IC GABA neurons project their  
255 axons locally, stimulating auditory cortico-collicular axons should thus suffice to  
256 generate feed-forward inhibitory postsynaptic currents (IPSCs) in the shell IC. We  
257 tested this hypothesis in Chronos-injected wild-type mice by voltage-clamping the  
258 somata of shell IC neurons near the reversal potential for excitation ( $\sim +5$  to  $+10$  mV)  
259 and stimulating corticofugal axons with trains of blue light flashes (25x, 50 Hz).

260 Recordings under these conditions were characterized by a flurry of spontaneous,  
261 outward inhibitory postsynaptic currents (IPSCs) that were preferentially sensitive to the  
262 GABA<sub>A</sub> receptor antagonist SR95531 (5-10  $\mu$ M; Supplemental Figure 5. Median IPSC  
263 rate: 13.5 vs. 0.0557 Hz in control and SR95531,  $p=0.0156$ , sign-rank test,  $n = 7$  cells  
264 from  $N = 3$  mice). Strikingly, stimulating auditory cortico-collicular axons caused a  $\sim$ 2-3  
265 fold increase in IPSC rate relative to baseline (Figure 8A,B), as revealed by a main  
266 effect of time in a two-way, repeated measures ANOVA ( $F(14,126)=11.7$ ,  $p<0.0001$ ,  $n =$   
267 10 cells from  $N = 5$  mice). Importantly, the IPSC rate increase was abolished by bath  
268 application of glutamate receptor antagonists NBQX (10  $\mu$ M) and/or R-CPP (5  $\mu$ M),  
269 indicating that it was mediated by polysynaptic activation of IC GABA neurons  
270 (Timepoint x drug interaction:  $F(14,126)=13.38$ ,  $p<0.0001$ ).

271  
272 Functionally, this feedforward inhibition controlled the temporal integration of  
273 corticofugal excitation: Blocking GABA<sub>A</sub> receptors significantly increased corticofugal  
274 EPSP summation during repetitive stimulation in current clamp, measured as a  
275 significant increase in the voltage integral following bath application of 5-10  $\mu$ M  
276 SR5931 (Figure 8C,D. Fractional change relative to control:  $1.18 \pm 0.06$ ,  $n = 12$  cells  
277 from  $N = 11$  mice.  $p=0.013$ , one sample t-test). Interestingly, we also noted a minor, but  
278 statistically significant increase in membrane resistance following SR95531 ( $386 \pm 61$   
279 vs.  $397 \pm 62$  M $\Omega$  in control and SR95531, respectively. Fractional change:  $1.04 \pm 0.014$ ,  
280  $p = 0.0204$ , one sample t-test). Although this observation argues that the high rates of  
281 spontaneous IPSCs from the local circuit contribute a certain level of effectively tonic  
282 inhibition (e.g., Supplemental Figure 5. See also Brickley et al., 1996, 2001), this small

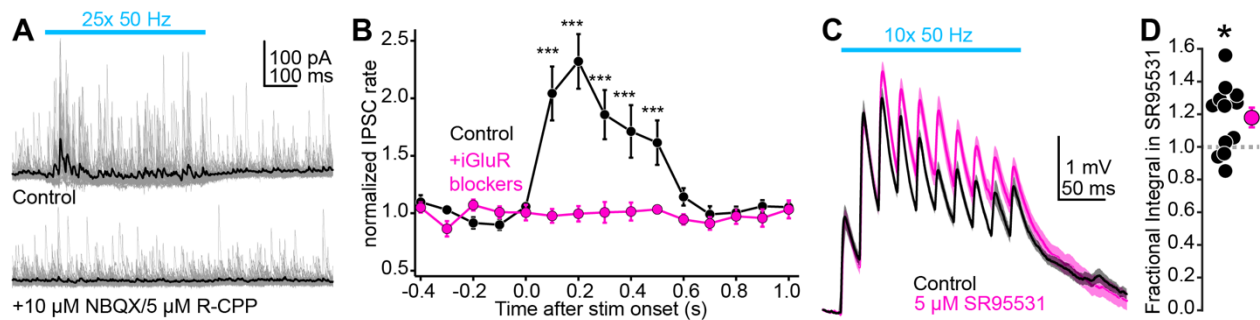

**Figure 8:** Corticofugal activity generates polysynaptic inhibition in the shell IC. **A)** Example recording from a shell IC neuron voltage clamped near the reversal potential for synaptic excitation, before and after bath application of glutamate receptor blockers. Gray traces are overlays of individual trials, black is average. Of note is that the powerful increase in IPSCs during corticofugal stimulation (blue bar) in control conditions is abolished by blocking glutamate receptors. **B)** The normalized IPSC rate is binned every 100 ms for statistical comparisons. Asterisks denote  $p<0.001$  following Sidak's post-hoc tests comparing appropriate control and drug timepoints. Of note is that significance is limited to timepoints during optical stimulation of corticofugal axons. **C)** Average traces showing temporal integration of corticofugal EPSPs in current-clamp before (black) and after (magenta) bath application of the GABA<sub>A</sub> receptor antagonist SR95531. Shading is  $\pm$  SEM. **D)** Summary data for the effect of SR95531 on corticofugal transmission current-clamp. Values are the ratio of voltage integrals in drug and control conditions. Asterisk denotes statistical significance.

283 change in membrane resistance in SR95531 is unlikely to account for our observed  
284 effect on EPSP summation: The relative increase in EPSP integral was more than 4-fold  
285 larger than the change in membrane resistance, and there was no significant pairwise  
286 correlation between the magnitude of EPSP enhancement and change in membrane  
287 resistance after SR95531 application (Pearson's coefficient  $\pm$  standard deviation from  
288 100 bootstrapped iterations:  $-0.25 \pm 0.36$ ,  $p = 0.43$ ). Thus, auditory cortico-collicular  
289 transmission generates intra-collicular inhibition that regulates how IC neurons integrate  
290 descending signals over time.

291

## 292 **Discussion**

293

294 Although decades of *in vivo* physiology show that auditory cortical activity inhibits IC  
295 sound responses, the underlying synaptic mechanisms have been difficult to pin down.  
296 Indeed, anatomy data suggest that auditory cortical axons preferentially target  
297 glutamate, rather than GABA neurons in the IC (Nakamoto et al., 2013; Chen et al.,  
298 2018). This anatomical motif is in striking contrast to the often studied pyramidal  
299 neuron-based microcircuits of sensory cortices and hippocampus, where long-range  
300 excitation powerfully drives feed-forward inhibition to sharpen temporal fidelity of  
301 afferent signals: Glutamatergic synapses onto GABAergic interneurons in these circuits  
302 are typically more numerous, have higher synaptic conductance, and/or higher release  
303 probability than onto pyramidal projection neurons (Acsády et al., 1998; Lawrence et al.,  
304 2004; Gabernet et al., 2005; Cruikshank et al., 2007). At first glance, the anatomical  
305 constraints of the auditory cortico-collicular pathway suggest that descending inhibition  
306 of the IC is unlikely to operate via a classical feedforward recruitment of locally  
307 projecting IC GABA neurons. Instead, auditory cortex may effectively recruit long-range  
308 inhibitory afferents to the IC (e.g., dorsal nucleus of the lateral lemniscus; Budinger et  
309 al., 2000), or alternatively may provide monosynaptic inhibition via a newly discovered,  
310 long-range projection from VIP GABAergic neurons (Bertero et al., 2021).

311

312 However, our experiments reveal cellular and circuit mechanisms that enable the  
313 auditory cortex to trigger intra-collicular inhibition in absence of a dense innervation onto  
314 IC GABA neurons. Consistent with the anatomical data (Nakamoto et al., 2013; Chen et  
315 al., 2018), corticofugal synapses tended to generate smaller EPSPs in IC GABA  
316 compared to glutamatergic neurons. Nevertheless, two cellular mechanisms enabled  
317 corticofugal activity to effectively increase firing rates of IC GABA neurons. First,  
318 approximately half of shell IC GABA neurons encountered in our study fired tonically,  
319 similar to findings in the NPY-positive GABA neurons of the central IC (Silveira et al.,  
320 2020). Thus, even apparently weak descending EPSPs sufficed to increase the basal  
321 firing rates of GABA neurons. Second, repetitive firing of corticofugal axons drives

322 robust polysynaptic excitation in IC GABA neurons due to local excitatory circuitry,  
323 thereby orchestrating a multisynaptic cascade leading to intra-collicular inhibition.

324

325 We did not observe direct monosynaptic GABAergic inputs from auditory cortex VIP  
326 neurons to the shell IC (Bertero et al., 2021). *In vitro*, the IPSC barrages recruited  
327 during auditory cortex stimulation were entirely blocked by glutamate receptor  
328 antagonists, indicating the necessity for intermediary, excitatory synapses onto IC  
329 GABA neurons with locally projecting axons. This result is perhaps surprising, as our  
330 stimulation paradigm was quite strong (25 light flashes at 50 Hz) and likely sufficed to  
331 activate descending synapses with low release probability. Furthermore, Bertero et al.  
332 showed that VIP-GABA axons terminate in the dorsomedial IC shell where our  
333 recordings were obtained. However, an absence of evidence is not conclusive evidence  
334 of absence: This newly discovered pathway may instead operate via non-canonical  
335 mechanisms such as extrasynaptic diffusion of GABA, or via release of the  
336 neuropeptide VIP. These synaptic properties would be difficult to quantify with our  
337 whole-cell patch-clamp recordings. In addition, selective viral tropism may have  
338 hindered the expression of our optogenetic construct in auditory cortical VIP neurons;  
339 extensive follow-up experiments are necessary to clarify these issues. Rather, our  
340 results show that intra-collicular mechanisms suffice to explain at least some of the  
341 auditory cortex' inhibitory actions on IC sound responses.

342

343 Functionally, the polysynaptic activity driven by descending transmission could enable a  
344 myriad of "high-level" computations in the shell IC. For example, previous work in  
345 piriform cortex shows that recurrent excitatory synapses from principal cells onto  
346 interneurons trigger feedback inhibition and truncates the duration of principal cell  
347 responses to incoming activity from the olfactory bulb. Although odorant signals from  
348 the bulb's lateral olfactory tract are graded with respect to odorant concentration, the  
349 output of piriform cortex principal cells is consequently rendered concentration invariant  
350 by this feedback inhibition which powerfully limits spiking to odor onset (Bolding and  
351 Franks, 2018). Our findings reveal a conceptually similar microcircuit architecture in the  
352 shell IC. Corticofugal projections, which potentially transmit behaviorally relevant  
353 information, could thus enhance IC glutamate neurons' ability to trigger feedback  
354 inhibition and promote a level-invariant representation of behaviorally relevant sounds in  
355 the IC. Such a computation may be particularly useful in creating invariant neural  
356 responses necessary for sound localization in complex, reverberant environments  
357 (Hartmann, 1983; Rakerd and Hartmann, 1986). Indeed, the onset spiking response of  
358 IC neurons represents directional signals that are less corrupted by reverberant  
359 reflections and inter-aural decorrelation than later, sustained responses (Devore et al.,  
360 2009). It is not unreasonable to assume that onset spiking in glutamate neurons could  
361 recruit feedback inhibition that minimizes sustained activity during the reverberant tail of

362 sounds, and that this mechanism is enhanced by “top-down” cortical signals during  
363 periods of increased vigilance and attention. However, extensive future studies are  
364 required to elucidate the behaviorally relevant conditions that trigger descending  
365 inhibitory control, and to understand how corticofugal projections might flexibly switch  
366 between amplifying and inhibiting tectal sound responses.

367

## 368 **Methods**

369

370 The experiments were approved by the University of Michigan’s IACUC and performed  
371 according to NIH’s Guide for the care and use of laboratory animals. *In vitro*  
372 experiments were performed on 5-8 week old male or female offspring of VGAT-ires-cre  
373 x Ai14 fl/fl or VGlut2-cre x G42 breeder pairs from our colony (Figures 2-7) or 5-8 week  
374 old C57/Bl6J mice ordered from Jackson labs (Figure 8). For *in vivo* experiments with  
375 wild-type mice, we used 4-7 week old offspring of CBA x C57Bl6/J matings (Figure  
376 1B,C) or 7-10 week old C57/Bl6J mice ordered from Jackson labs (Figure 1E,F). The  
377 raw data from some of these *in vivo* recordings were also included in a previous set of  
378 distinct analyses (Oberle et al., 2022).

379

380 *Surgery for intracranial virus injections:* Our virus injection protocol is described in detail  
381 in Oberle et al., 2022. Briefly, mice were anesthetized with 4-5% isoflurane in O<sub>2</sub>,  
382 mounted in a stereotaxic frame, and isoflurane was lowered to 1-2% while body  
383 temperature was maintained near 37-38° C using a heating blanket. Mice were  
384 administered 5 mg/kg carprofen as a pre-surgical analgesic, a small incision was made  
385 in the scalp, and 2% lidocaine was then applied to the wound margins. A 200-400 µm  
386 craniotomy was carefully drilled over the left auditory cortex (-2.75 mm from Bregma,  
387 centered on the lateral ridge) or left IC (0.9 mm caudal and 1 mm lateral from lambda  
388 suture) to inject 100-200 nL of pAAV-Syn-Chronos-GFP (Addgene #59170-AAV1) or  
389 pAAV-syn-flex-rc[ChrimsonR-tdTomato] (Addgene #62723-AAV5) virus. At the end of  
390 the surgery, the craniotomy was filled with bone wax and the skin was sutured.  
391 Immediately following surgery, mice received an analgesic injection of buprenorphine  
392 (0.03 mg/kg, s.c.) and recovered on a heating pad before returning to their home cage.  
393 A post-operative dose of carprofen was administered ~24 hours later.

394

395 *In vivo electrophysiology:* Mice were deeply anesthetized with isoflurane, mounted in  
396 the stereotaxic frame, and craniotomies were carefully opened over the left IC and  
397 auditory cortex as described above and in Oberle et al. 2022. For optogenetic  
398 stimulation, we left the dura intact and implanted a cranial window over the auditory  
399 cortex. For electrical stimulation we made a small slit in the dura and the craniotomy  
400 was sealed with silicone elastomer. The IC craniotomy was plugged with silicone  
401 elastomer, a titanium headbar was implanted with dental cement, and the mouse was  
402 removed from the stereotax before being re-anesthetized with urethane (1.5 g/kg, i.p.)

403 and head-fixed in a custom-made sound attenuation chamber. Body temperature during  
404 the recording session was maintained at 37-38° C with a custom designed, feedback-  
405 controlled heating blanket. Optogenetic stimulation was performed with a 0.5 NA, 400  
406  $\mu\text{m}$  core optic fiber (Thorlabs M45L02) coupled to a 470 nm LED (Thorlabs M470F3)  
407 positioned  $<1$  mm away from the auditory cortex cranial window. For electrical  
408 stimulation experiments, a bipolar platinum-iridium electrode (FHC 30210) was carefully  
409 inserted  $\sim 800$   $\mu\text{m}$  into auditory cortex at an angle roughly perpendicular to the cortical  
410 layers and shocks were delivered via a custom stimulus isolator. Whole-cell current-  
411 clamp recordings were obtained  $\sim 100$ - $400$   $\mu\text{m}$  from the dura with pipettes containing (in  
412 mM): 115 K-Gluconate, 4 KCl, 0.1 EGTA, 10 HEPES, 14 Tris-Phosphocreatine, 4 Mg-  
413 ATP, 0.5 Tris-GTP, 4 NaCl, pH 7.2-7.3, 290 mOsm (open tip resistance: 5-10 M $\Omega$ ).

414  
415 *In vitro electrophysiology:* 2-4 weeks following viral injections, mice were deeply  
416 anesthetized with isoflurane and 200-300  $\mu\text{m}$  brain slices containing both IC  
417 hemispheres were prepared in warm ( $\sim 34^\circ$  C) oxygenated ACSF containing (in mM):  
418 119 NaCl, 25 NaHCO<sub>3</sub>, 3 KCl, 1.25 NaH<sub>2</sub>PO<sub>4</sub>, 15 glucose, 1 MgCl<sub>2</sub>, 1.3 CaCl<sub>2</sub>, 1  
419 ascorbate, 3 pyruvate. A small cut was typically made in the lateral portion of the right  
420 cerebellum or right IC to visually identify the un-injected hemisphere. Slices were then  
421 incubated at  $34^\circ$  C in a holding chamber filled ACSF for 25-30 min and then stored at  
422 room temperature until use. During experiments, slices were mounted in a submersion  
423 chamber continuously perfused with oxygenated ACSF heated to  $32$ - $34^\circ$  C (2-4 mL/min;  
424 chamber volume:  $\sim 1$  mL). Neurons in the dorso-medial shell IC were visualized via DIC  
425 or Dodt contrast optics using a 40x or 63x objective (Zeiss Axioskop 2 FS Plus or  
426 Olympus BXW51 microscope). GABA neurons were identified from tdTomato or GFP  
427 fluorescence. Presumptive glutamate neurons were identified based on lack of  
428 fluorescence in VGAT-cre x Ai14 mice. Whole-cell current-clamp recordings were  
429 obtained using pipettes filled with the same K<sup>+</sup> rich internal solution as employed for in  
430 vivo recordings (open tip resistance: 3-6 M $\Omega$ ). In some experiments, 30  $\mu\text{M}$  Alexa 488  
431 or 0.1% biocytin were added to the internal solution to visualize neuronal morphology  
432 via online fluorescence or post-hoc histological reconstruction. Voltage clamp  
433 recordings were obtained with a Cs<sup>+</sup> based solution containing (in mM): 110 Cesium  
434 Methanesulfonate, 10 QX-314-Bromide, 0.1 EGTA, 10 HEPES, 0.5 Tris-GTP, 4.5  
435 MgATP, 5 TEA-Cl, 10 Tris-phosphocreatine. Experiments were generally conducted  
436 within 3-4 hours following slice preparation. Chronos-expressing axons were stimulated  
437 via 2-5 ms wide-field flashes of blue light delivered through the microscope objective.  
438 ChrimsonR-expressing IC neurons were stimulated via 0.5-1 ms flashes from a 400  $\mu\text{m}$   
439 diameter optic fiber (0.5 NA) coupled to a 625 nm LED  $<1$  mm above the slice.

440  
441 *Data Acquisition:* Data were acquired using a Molecular Devices Multiclamp 700B or  
442 AM Systems model 2400 patch-clamp amplifier, online filtered at 2-10 kHz, and digitized



443 at 50 kHz with a National Instruments PCI-6343 card + BNC2090A interface controlled  
444 by Matlab based acquisition software (Wavesurfer). As shown in Figure 4, many GABA  
445 neurons fired tonically *in vitro*. Consequently, negative bias current (-5 to -200 pA) was  
446 often injected to hyperpolarize neurons and prevent spontaneous or optogenetically  
447 triggered spiking when recording EPSPs in GABA neurons.

448  
449 Data analysis: All experiments were analyzed using custom scripts written in Matlab.  
450 Analyses in Figures 1, 2, 5, 7, and 8 were run on averages of multiple trials (typically  
451 >10 trials per condition) after baseline subtraction and lowpass filtering at 1 kHz. EPSP  
452 peak amplitudes were calculated by averaging data points  $\pm 0.1$  ms around the local  
453 maximum following optogenetic stimulation. Halfwidths were defined as the full width at  
454 half-maximum of the peak. Voltage integrals were calculated using the Matlab functions  
455 trapz() or cumtrapz(). Event detection analyses in Figures 3, 4, 6, and 8 were conducted  
456 by differentiating the membrane voltage or current traces, smoothing the data (1-5 ms  
457 sliding window), and using threshold crossing or peak detection algorithms to identify  
458 synaptic events. Synaptic current waveforms (Figure 4C,D) were generated in  
459 Wavemetrics Igor Pro using the Neuromatic package (Rothman and Silver, 2018).

460  
461 Statistics: In the text, n and N refer to the number of neurons and mice, respectively.  
462 Sample sizes were not explicitly pre-determined prior to data collection. However, the  
463 number of cells and mice in these experiments are in accordance with commonly  
464 accepted standards in the field. Data were tested for normality using a Lilliefors test  
465 prior to statistical comparisons. Parametric tests were used for normally distributed  
466 data, while non-parametric tests were used if one or more of the datasets deviated from  
467 normal. Alpha is corrected for multiple comparisons in post-hoc significance tests  
468 following ANOVA. Statistics were run in Matlab or Graphpad Prism 9. Pearson's  
469 coefficient and associated bootstraps were calculated in Matlab with the functions corr()  
470 and bootstrp(), respectively.

471  
472 **Author Contributions:** HMO + PFA conducted and analyzed experiments of Figures 1  
473 + 8. ANF performed stereotaxic injections with contributions from HMO. HMO + ANF  
474 conducted histology and confocal imaging. PFA performed and analyzed experiments of  
475 Figures 2-7, interpreted the results, and wrote the paper.

476  
477 **Acknowledgments:** Funding was provided by the Whitehall Foundation, Hearing  
478 Health Foundation, and NIH/NIDCD R01DC019090 to PFA, as well as T32DC005356  
479 and T32DC000011 to HMO. We thank Dr. Michael Roberts for critical comments on the  
480 manuscript, Dr. Kevin Jones for providing the G42 mouse used for histology in  
481 Supplemental Figure 2, Dr. Meike Rogalla for the illustrations in Figure 1, and Jordyn  
482 Czarny for technical assistance with histology.

483

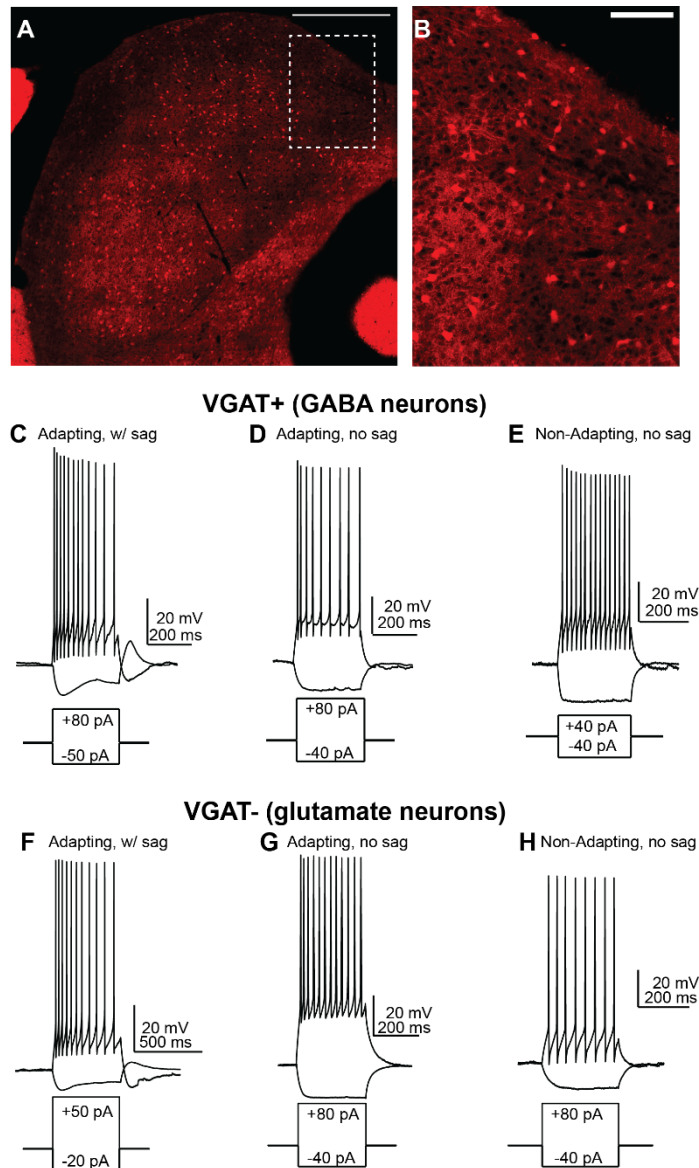

484 **Supplemental Figure 1: IC GABA and glutamate neurons have similar cellular**  
485 **properties.**

486 **A)** Tile scan of the IC in a VGAT-cre x Ai14 mouse. An area of interest is denoted by the  
487 dashed line and shown at higher magnification in panel B. Scale bar = 500  $\mu\text{m}$ .

488 **B)** Magnification of dashed rectangle in panel A. The micrograph was contrast  
489 enhanced to highlight tdTomato-positive GABA neurons and tdTomato-negative,  
490 presumptive glutamate neurons visible as dark “shadows”. Scale bar = 100  $\mu\text{m}$ .

491 **C-E)** Examples of distinct types of hyperpolarizing and depolarizing responses in GABA  
492 neurons encountered in the shell IC.

493 **F-H)** Same as A-C, but for glutamate neurons. Of note is the qualitative similarity in  
494 firing patterns and membrane properties of both neuron classes.

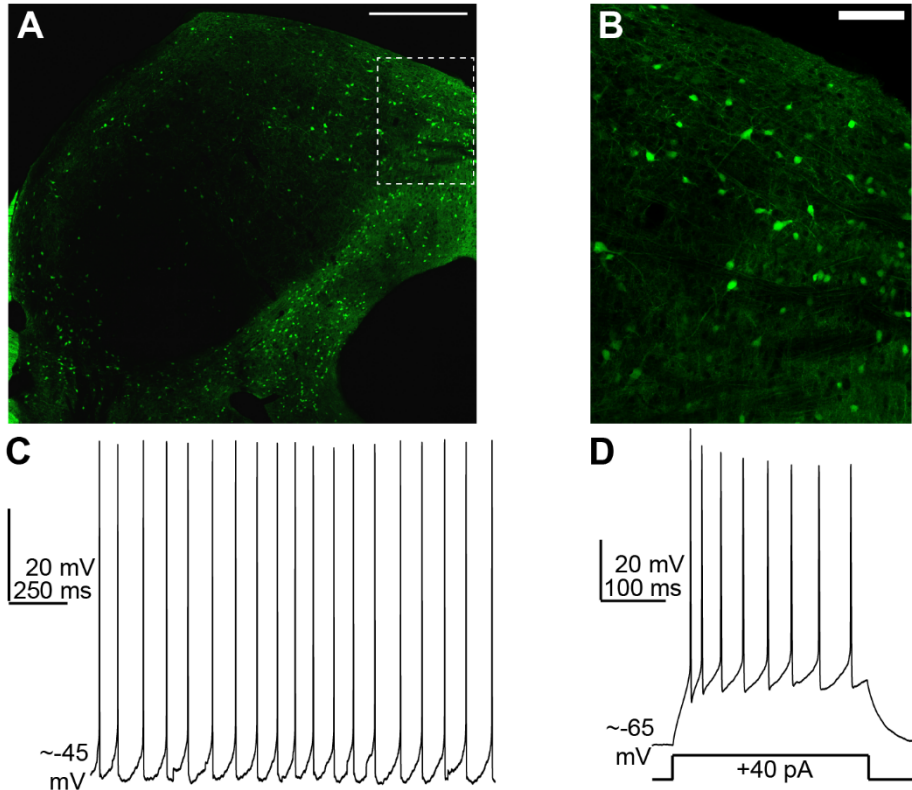

495 **Supplemental Figure 2:** *G42 mouse line labels a sparse population of IC GABA*  
496 *neurons.*

497 **A)** Confocal micrograph from the IC of a G42-GFP mouse. Scale bar = 500  $\mu\text{m}$ . Dashed  
498 rectangle denotes area of interest in the dorso-medial shell IC.

499 **B)** Area of interest from panel A shown at higher magnification. Scale bar = 100  $\mu\text{m}$ .

500 **C)** Example current-clamp recording from a GFP+ neuron in the dorso-medial IC of a  
501 G42 mouse. The majority of GFP+ neurons recorded in G42 mice fired spontaneously  
502 when recorded in current-clamp with 0 pA bias current (8/11 neurons tested).

503 **D)** Example trace from the same neuron in panel C, but hyperpolarized with -30 pA bias  
504 current. A +40 pA current injection step reveals an adapting firing pattern. 18/21  
505 neurons tested had similar adapting spike patterns when injected with current steps  
506 following membrane hyperpolarization to prevent spontaneous spiking. The remaining  
507 GFP+ neurons either fired a transient burst of spikes atop a T-type like hump (n=2 cells;  
508 See also Figure 3E from Oberle et al., 2022), whereas n = 1 cell showed minimal spike  
509 rate adaptation.

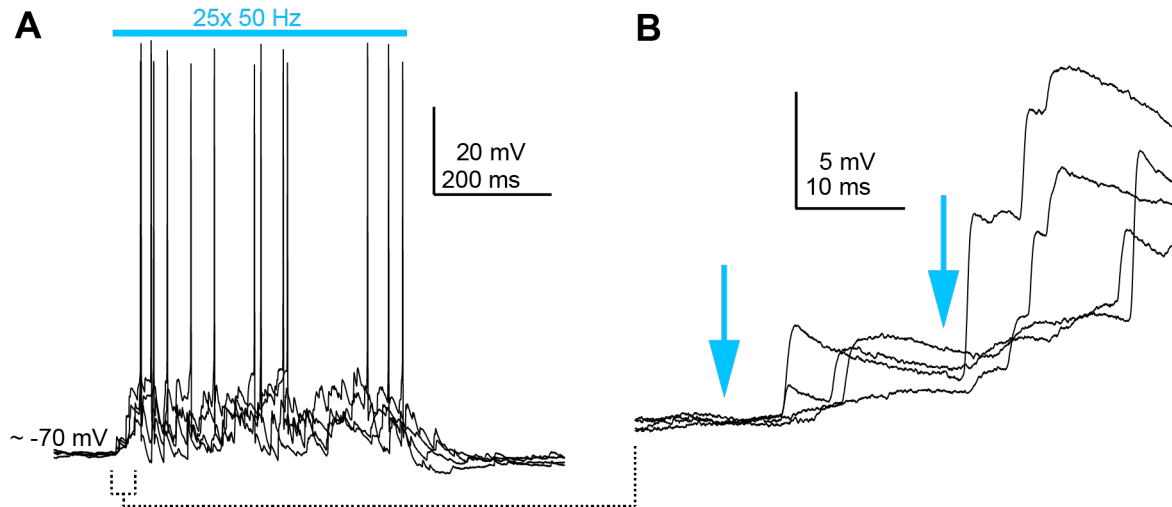

510 **Supplemental Figure 3: Polysynaptic excitation drives spikes in IC GABA neurons**  
511 **A)** Example recording where repetitive corticofugal stimulation triggered spiking in an IC  
512 GABA neuron. Records are multiple overlaid single trials.  
513 **B)** EPSPs evoked by the first two light flashes in (A) are shown at a faster time base to  
514 highlight the onset jitter and polysynaptic nature of the EPSPs.

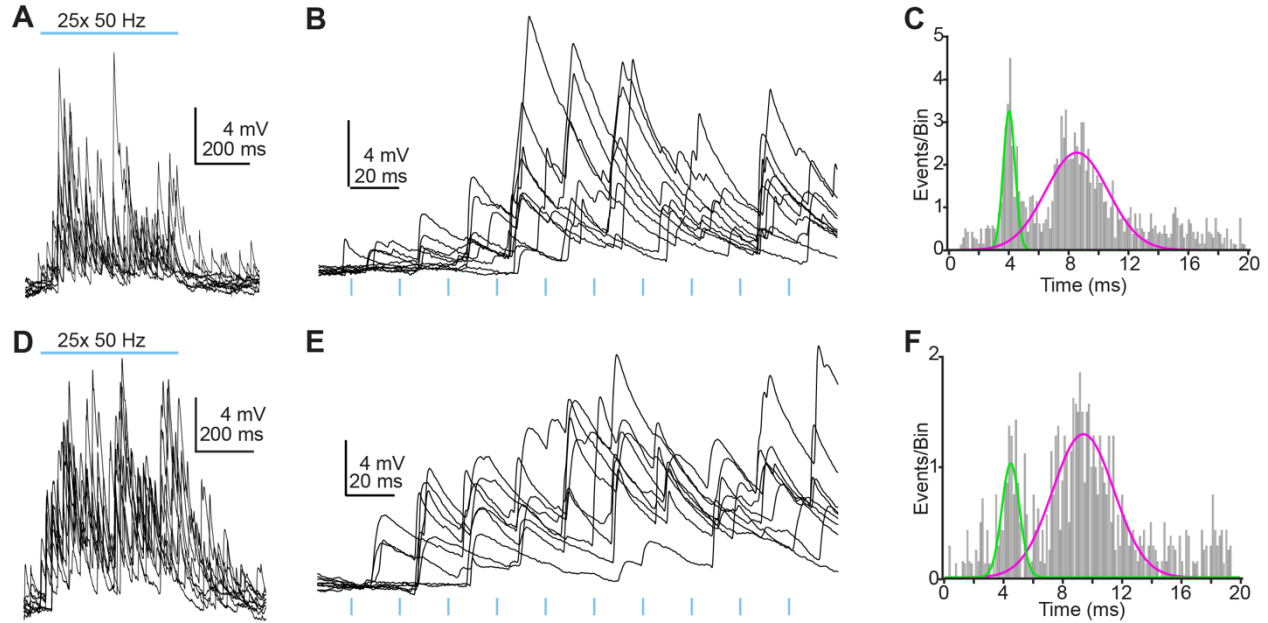

515 **Supplemental Figure 4: Additional examples of polysynaptic EPSPs in GABA neurons.**

516 **A)** Example overlaid traces (10 consecutive trials) from an IC GABA neuron. Blue bar  
517 denotes stimulation of corticofugal fibers.

518 **B)** Traces in A expanded to highlight EPSPs evoked during the first 10 light pulses. Blue  
519 ticks indicate onset of individual light flashes.

520 **C)** Latency histogram for EPSPs of the neuron of A+B, showing two distinct peaks.

521 **D-F)** Same as panels A-C but for a different GABA neuron.

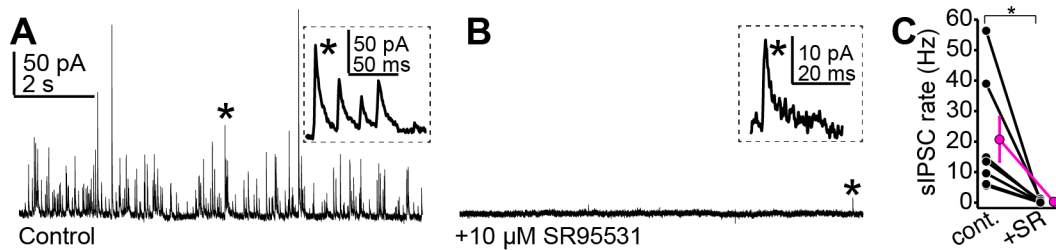

522 **Supplemental Figure 5: Spontaneous IPSCs in shell IC neurons are predominantly**  
523 **mediated by GABA<sub>A</sub> receptors.**

524 **A)** Example voltage-clamp recording from a shell IC neuron held at +8 mV. Of note are  
525 the spontaneous IPSCs often occurring in bursts, suggesting they are mediated by  
526 action potentials in local GABA neurons. Asterisk denotes one such IPSC burst shown  
527 at a faster time base in the inset.

528 **B)** In the same cell as shown in panel A, bath application of the GABA<sub>A</sub> receptor  
529 antagonist SR95531 (10 μM) blocks the majority of spontaneous IPSCs. Although quite  
530 rare, a few small amplitude events nevertheless remained in the presence of SR95531  
531 (asterisk and inset; median IPSC rate in SR95531: one event per 17.95 seconds).  
532 These SR95531 resistant outward currents may reflect long-range glycinergic inputs  
533 from the ventral nucleus of the lateral lemniscus (Moore and Trussell, 2017).

534 **C)** Summary data for n = 7 cells showing that SR95531 profoundly reduces  
535 spontaneous IPSC rates, indicating that inhibitory transmission in shell IC neurons is  
536 mostly GABAergic.

## 537 **References**

- 538 Acsády L, Kamondi A, Sík A, Freund T, Buzsáki G (1998) GABAergic cells are the  
539 major postsynaptic targets of mossy fibers in the rat hippocampus. *J Neurosci Off*  
540 *J Soc Neurosci* 18:3386–3403.
- 541 Asilador A, Llano DA (2020) Top-Down Inference in the Auditory System: Potential  
542 Roles for Corticofugal Projections. *Front Neural Circuits* 14:615259.
- 543 Beneyto M, Winer JA, Larue DT, Prieto JJ (1998) Auditory connections and  
544 neurochemistry of the sagulum. *J Comp Neurol* 401:329–351.
- 545 Bertero A, Garcia C, Apicella AJ (2021) Corticofugal VIP Gabaergic Projection Neurons  
546 in the Mouse Auditory and Motor Cortex. *Front Neural Circuits* 15:714780.
- 547 Blackwell JM, Lesicko AM, Rao W, De Biasi M, Geffen MN (2020) Auditory cortex  
548 shapes sound responses in the inferior colliculus. *eLife* 9:e51890.
- 549 Bledsoe SC, Shore SE, Guitton MJ (2003) Spatial representation of corticofugal input in  
550 the inferior colliculus: a multicontact silicon probe approach. *Exp Brain Res*  
551 153:530–542.
- 552 Bolding KA, Franks KM (2018) Recurrent cortical circuits implement concentration-  
553 invariant odor coding. *Science* 361:eaat6904.
- 554 Born G, Schneider-Soupiadis FA, Erisken S, Vaiceliunaite A, Lao CL, Mobarhan MH,  
555 Spacek MA, Einevoll GT, Busse L (2021) Corticothalamic feedback sculpts visual  
556 spatial integration in mouse thalamus. *Nat Neurosci* 24:1711–1720.
- 557 Boyd AM, Sturgill JF, Poo C, Isaacson JS (2012) Cortical feedback control of olfactory  
558 bulb circuits. *Neuron* 76:1161–1174.
- 559 Brickley SG, Cull-Candy SG, Farrant M (1996) Development of a tonic form of synaptic  
560 inhibition in rat cerebellar granule cells resulting from persistent activation of  
561 GABAA receptors. *J Physiol* 497 ( Pt 3):753–759.
- 562 Brickley SG, Revilla V, Cull-Candy SG, Wisden W, Farrant M (2001) Adaptive regulation  
563 of neuronal excitability by a voltage-independent potassium conductance. *Nature*  
564 409:88–92.
- 565 Briggs F, Usrey WM (2011) Corticogeniculate feedback and visual processing in the  
566 primate. *J Physiol* 589:33–40.
- 567 Budinger E, Heil P, Scheich H (2000) Functional organization of auditory cortex in the  
568 Mongolian gerbil (*Meriones unguiculatus*). IV. Connections with anatomically  
569 characterized subcortical structures. *Eur J Neurosci* 12:2452–2474.

- 570 Chattopadhyaya B, Di Cristo G, Higashiyama H, Knott GW, Kuhlman SJ, Welker E,  
571 Huang ZJ (2004) Experience and activity-dependent maturation of perisomatic  
572 GABAergic innervation in primary visual cortex during a postnatal critical period.  
573 *J Neurosci Off J Soc Neurosci* 24:9598–9611.
- 574 Chen C, Cheng M, Ito T, Song S (2018) Neuronal Organization in the Inferior Colliculus  
575 Revisited with Cell-Type-Dependent Monosynaptic Tracing. *J Neurosci* 38:3318–  
576 3332.
- 577 Crandall SR, Cruikshank SJ, Connors BW (2015) A corticothalamic switch: controlling  
578 the thalamus with dynamic synapses. *Neuron* 86:768–782.
- 579 Cruikshank SJ, Lewis TJ, Connors BW (2007) Synaptic basis for intense  
580 thalamocortical activation of feedforward inhibitory cells in neocortex. *Nat*  
581 *Neurosci* 10:462–468.
- 582 Devore S, Ihlefeld A, Hancock K, Shinn-Cunningham B, Delgutte B (2009) Accurate  
583 sound localization in reverberant environments is mediated by robust encoding of  
584 spatial cues in the auditory midbrain. *Neuron* 62:123–134.
- 585 Diamond JS, Jahr CE (1997) Transporters buffer synaptically released glutamate on a  
586 submillisecond time scale. *J Neurosci Off J Soc Neurosci* 17:4672–4687.
- 587 Gabernet L, Jadhav SP, Feldman DE, Carandini M, Scanziani M (2005) Somatosensory  
588 integration controlled by dynamic thalamocortical feed-forward inhibition. *Neuron*  
589 48:315–327.
- 590 Hartmann WM (1983) Localization of sound in rooms. *J Acoust Soc Am* 74:1380–1391.
- 591 Hattox AM, Nelson SB (2007) Layer V neurons in mouse cortex projecting to different  
592 targets have distinct physiological properties. *J Neurophysiol* 98:3330–3340.
- 593 Kirchgessner MA, Franklin AD, Callaway EM (2021) Distinct “driving” versus  
594 “modulatory” influences of different visual corticothalamic pathways. *Curr Biol*  
595 *CB:S0960-9822(21)01265-3*.
- 596 Kong L, Xiong C, Li L, Yan J (2014) Frequency-specific corticofugal modulation of the  
597 dorsal cochlear nucleus in mice. *Front Syst Neurosci* 8
- 598 Lawrence JJ, Grinspan ZM, McBain CJ (2004) Quantal transmission at mossy fibre  
599 targets in the CA3 region of the rat hippocampus. *J Physiol* 554:175–193.
- 600 Mitani A, Shimokouchi M, Nomura S (1983) Effects of stimulation of the primary auditory  
601 cortex upon colliculogeniculate neurons in the inferior colliculus of the cat.  
602 *Neurosci Lett* 42:185–189.
- 603 Moore LA, Trussell LO (2017) Corelease of Inhibitory Neurotransmitters in the Mouse  
604 Auditory Midbrain. *J Neurosci Off J Soc Neurosci* 37:9453–9464.



- 605 Nakamoto KT, Mellott JG, Killius J, Storey-Workley ME, Sowick CS, Schofield BR  
606 (2013) Ultrastructural examination of the corticocollicular pathway in the guinea  
607 pig: a study using electron microscopy, neural tracers, and GABA  
608 immunocytochemistry. *Front Neuroanat* 7
- 609 Naumov V, Heyd J, de Arnal F, Koch U (2019) Analysis of excitatory and inhibitory  
610 neuron types in the inferior colliculus based on Ih properties. *J Neurophysiol*  
611 121:2126–2139.
- 612 Nwabueze-Ogbo FC, Popelár J, Syka J (2002) Changes in the acoustically evoked  
613 activity in the inferior colliculus of the rat after functional ablation of the auditory  
614 cortex. *Physiol Res* 51 Suppl 1:S95–S104.
- 615 Oberle HM, Ford AN, Dileepkumar D, Czarny J, Apostolides PF (2022) Synaptic  
616 mechanisms of top-down control in the non-lemniscal inferior colliculus. *eLife*  
617 10:e72730.
- 618 Ono M, Yanagawa Y, Koyano K (2005) GABAergic neurons in inferior colliculus of the  
619 GAD67-GFP knock-in mouse: electrophysiological and morphological properties.  
620 *Neurosci Res* 51:475–492.
- 621 Popelár J, Nwabueze-Ogbo FC, Syka J (2003) Changes in neuronal activity of the  
622 inferior colliculus in rat after temporal inactivation of the auditory cortex. *Physiol*  
623 *Res* 52:615–628.
- 624 Popelář J, Šuta D, Lindovský J, Bureš Z, Pysanenko K, Chumak T, Syka J (2016)  
625 Cooling of the auditory cortex modifies neuronal activity in the inferior colliculus in  
626 rats. *Hear Res* 332:7–16.
- 627 Pouille F, Scanziani M (2001) Enforcement of temporal fidelity in pyramidal cells by  
628 somatic feed-forward inhibition. *Science* 293:1159–1163.
- 629 Qi J, Zhang Z, He N, Liu X, Zhang C, Yan J (2020) Cortical Stimulation Induces  
630 Excitatory Postsynaptic Potentials of Inferior Colliculus Neurons in a Frequency-  
631 Specific Manner. *Front Neural Circuits* 14:591986.
- 632 Rakerd B, Hartmann WM (1986) Localization of sound in rooms, III: Onset and duration  
633 effects. *J Acoust Soc Am* 80:1695–1706.
- 634 Randle JC, Guet T, Cordi A, Lepagnol JM (1992) Competitive inhibition by NBQX of  
635 kainate/AMPA receptor currents and excitatory synaptic potentials: importance of  
636 6-nitro substitution. *Eur J Pharmacol* 215:237–244.
- 637 Rothman JS, Silver RA (2018) NeuroMatic: An Integrated Open-Source Software  
638 Toolkit for Acquisition, Analysis and Simulation of Electrophysiological Data.  
639 *Front Neuroinformatics* 12:14.

- 640 Schofield BR (2009) Projections to the inferior colliculus from layer VI cells of auditory  
641 cortex. *Neuroscience* 159:246–258.
- 642 Sherman SM, Usrey WM (2021) Cortical control of behavior and attention from an  
643 evolutionary perspective. *Neuron*:S0896-6273(21)00462-1.
- 644 Silveira MA, Anair JD, Beebe NL, Mirjalili P, Schofield BR, Roberts MT (2020)  
645 Neuropeptide Y Expression Defines a Novel Class of GABAergic Projection  
646 Neuron in the Inferior Colliculus. *J Neurosci* 40:4685–4699.
- 647 Slater BJ, Willis AM, Llano DA (2013) Evidence for layer-specific differences in auditory  
648 corticocollicular neurons. *Neuroscience* 229:144–154.
- 649 Song JH, Lucaci D, Calangiu I, Brown MTC, Park JS, Kim J, Brickley SG, Chadderton P  
650 (2018) Combining mGRASP and Optogenetics Enables High-Resolution  
651 Functional Mapping of Descending Cortical Projections. *Cell Rep* 24:1071–1080.
- 652 Stebbings KA, Lesicko AMH, Llano DA (2014) The auditory corticocollicular system:  
653 Molecular and circuit-level considerations. *Hear Res* 314:51–59.
- 654 Syka J, Popelár J (1984) Inferior colliculus in the rat: neuronal responses to stimulation  
655 of the auditory cortex. *Neurosci Lett* 51:235–240.
- 656 Usrey WM, Sherman SM (2019) Corticofugal circuits: Communication lines from the  
657 cortex to the rest of the brain. *J Comp Neurol* 527:640–650.
- 658 Vila C-H, Williamson RS, Hancock KE, Polley DB (2019) Optimizing optogenetic  
659 stimulation protocols in auditory corticofugal neurons based on closed-loop spike  
660 feedback. *J Neural Eng* 16:066023.
- 661 Williamson RS, Polley DB (2019) Parallel pathways for sound processing and functional  
662 connectivity among layer 5 and 6 auditory corticofugal neurons. *eLife* 8:e42974.
- 663 Winer JA, Larue DT, Diehl JJ, Hefti BJ (1998) Auditory cortical projections to the cat  
664 inferior colliculus. *J Comp Neurol* 400:147–174.
- 665 Zhang Y, Suga N (1997) Corticofugal amplification of subcortical responses to single  
666 tone stimuli in the mustached bat. *J Neurophysiol* 78:3489–3492.
- 667 Zhang Y, Suga N, Yan J (1997) Corticofugal modulation of frequency processing in bat  
668 auditory system. *Nature* 387:900–903.
- 669
